# Supplementary material for: MicroCT data provide evidence correcting the previous misidentification of an Eocene amber beetle (Coleoptera, Cicindelidae) as an extant species
Source: PubMed Central journal article supplement (PMC10484930; doi:10.1038/s41598-023-39158-7), 2023-09-07
Supplement: 41598_2023_39158_MOESM1_ESM.pdf [file 41598_2023_39158_MOESM1_ESM.pdf]

**MicroCT data turn taxonomy upside down:  
The mystery of Walter Horn's Baltic amber tiger beetle solved  
(Coleoptera: Cicindelidae)**

**Supplementary information**

**Table S1.** MicroCT scan settings applied to the investigated *Palaeoiresina cassolai* fossil specimens from Baltic amber.

| scan settings                | MB.J 1647         |             | UCMP404030 (holotype) |             |
|------------------------------|-------------------|-------------|-----------------------|-------------|
|                              | total beetle body | head        | head                  | pterothorax |
| voltage [V]                  | 40                | 50          | 40                    | 40          |
| power [W]                    | 8                 | 8           | 8                     | 8           |
| object lens                  | 0.4               | 4           | 4                     | 4           |
| lens filter                  | LE1               | LE1         | -                     | -           |
| cam binning                  | 1                 | 2           | 2                     | 2           |
| distance to source [mm]      | 40                | 70          | 120                   | 55          |
| distance to detector [mm]    | 140               | 35          | 120                   | 69          |
| vertical stitch              | -                 | -           | 2                     | -           |
| voxel size [ $\mu\text{m}$ ] | 7.4               | 4.4         | 4.3                   | 4.6         |
| exposure time [sec]          | 25                | 20          | 20                    | 40          |
| number of images/ segment    | 981 (208°)        | 1001 (186°) | 2401 (360°)           | 2401 (360°) |

**Table S2.** *Palaeoiresina cassolai* fossil specimens from Baltic amber: details of measurement methods and measurement results.

| character                                        | measurement method                                                                                             | value [mm] |                       |
|--------------------------------------------------|----------------------------------------------------------------------------------------------------------------|------------|-----------------------|
|                                                  |                                                                                                                | MB.J 1647  | UCMP404030 (holotype) |
| standardized body length                         | equals the sum of the lengths of the head, pronotum, and the longer elytron                                    | 11.7       | 9.6*                  |
| length of the head                               | from anterior margin of clypeus to a point on the midline at level of the posterior margin of the compound eye | 1.53       | 1.37                  |
| width of head including compound eyes            | across the widest portion including compound eyes                                                              | 2.80       | 2.33                  |
| width of head between compound eyes              | across the shortest distance between compound eyes                                                             | 1.64       | 1.48                  |
| length of the compound eye: left/right           | at their widest points (lateral aspect)                                                                        | 1.05/1.01  | 8.45/8.64             |
| width of labrum                                  | at the widest portion                                                                                          | 1.58       | 1.36                  |
| length of the antennomer 1: left/right           | between most distant points                                                                                    | 0.84/0.87  | 0.86/n.a.             |
| length of the antennomer 2: left/right           | between most distant points                                                                                    | 0.33/0.35  | 0.30/n.a.             |
| length of mandibular incisor tooth (left/right)  | from internal base to apex (Ball et al. 2011)                                                                  | 0.94/1.13  | 0.96/1.03             |
| length of the maxillary palpomere 2 (left/right) | between most distant points                                                                                    | 0.95/0.90  | 0.81/0.81             |
| length of the maxillary palpomere 3 (left/right) | between most distant points                                                                                    | 0.79/0.77  | 0.63/0.65             |
| length of the maxillary palpomere 4 (left/right) | between most distant points                                                                                    | 0.73/0.75  | 0.63/0.63             |
| length of the labial palpomere 3 (left/right)    | between most distant points                                                                                    | 1.27/1.25  | 1.09/1.09             |
| length of the labial palpomere 4 (left/right)    | between most distant points                                                                                    | 1.24/1.22  | 1.16/1.15             |
| length of pronotum                               | from apical to basal margin along midline                                                                      | 2.35       | 2.17                  |
| width of pronotum                                | at the widest portion (dorsal aspect)                                                                          | 2.36       | 2.15                  |
| pronotal apical width                            | between the tips of the front angles                                                                           | 2.07       | 1.86                  |
| pronotal basal width                             | maximum width at level of hind angles                                                                          | 2.00       | 1.70                  |
| length of elytron (left/right)                   | from the apex of scutellum to the apex of the elytron                                                          | 7.86/7.81  | 6.0*                  |
| width of elytron (left/right)                    | at their widest points (dorsal aspect)                                                                         | 2.68/2.70  | 1.8*                  |
| length of the metepisternum (left/right)         | along lateral margin                                                                                           | n.a./1.55  | 1.39/1.36             |
| width of the metepisternum (left/right)          | along anterior margin                                                                                          | n.a./0.95  | 0.88/0.90             |
| length of metafemur (left/right)                 | between most distant points                                                                                    | n.a./5.02  | n.a./n.a.             |

\*Because apical portion of elytra is not preserved, the values were estimated based on the light microscopic photographs and the habitus reconstruction presented by Wiesner et al. (2017).

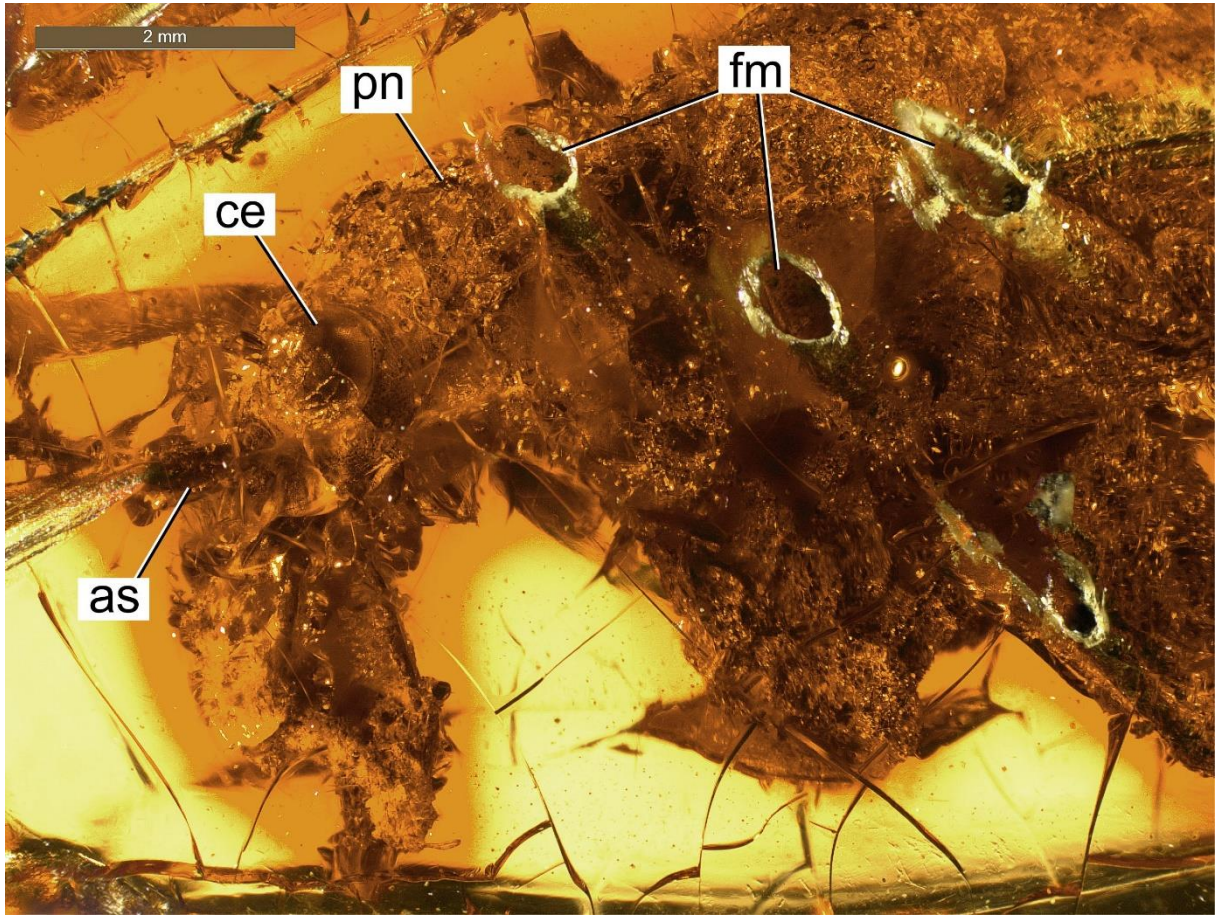

**Figure S1.** Light microscopic documentation of Horn's tiger beetle fossil (*Palaeoiresina cassolai* Wiesner et al., 2017) with specimen ID MB.J 1647 in the Museum of Natural History, Berlin (NMB): anterior part of the beetle body, left lateral view. Abbreviations: as: antennal scape; ce: compound eye; fm: femora (the black and white bars point to the openings of the left pro-, meso- and metafemora to the amber surface that were resulted from the amber cutting); pn: pronotum.



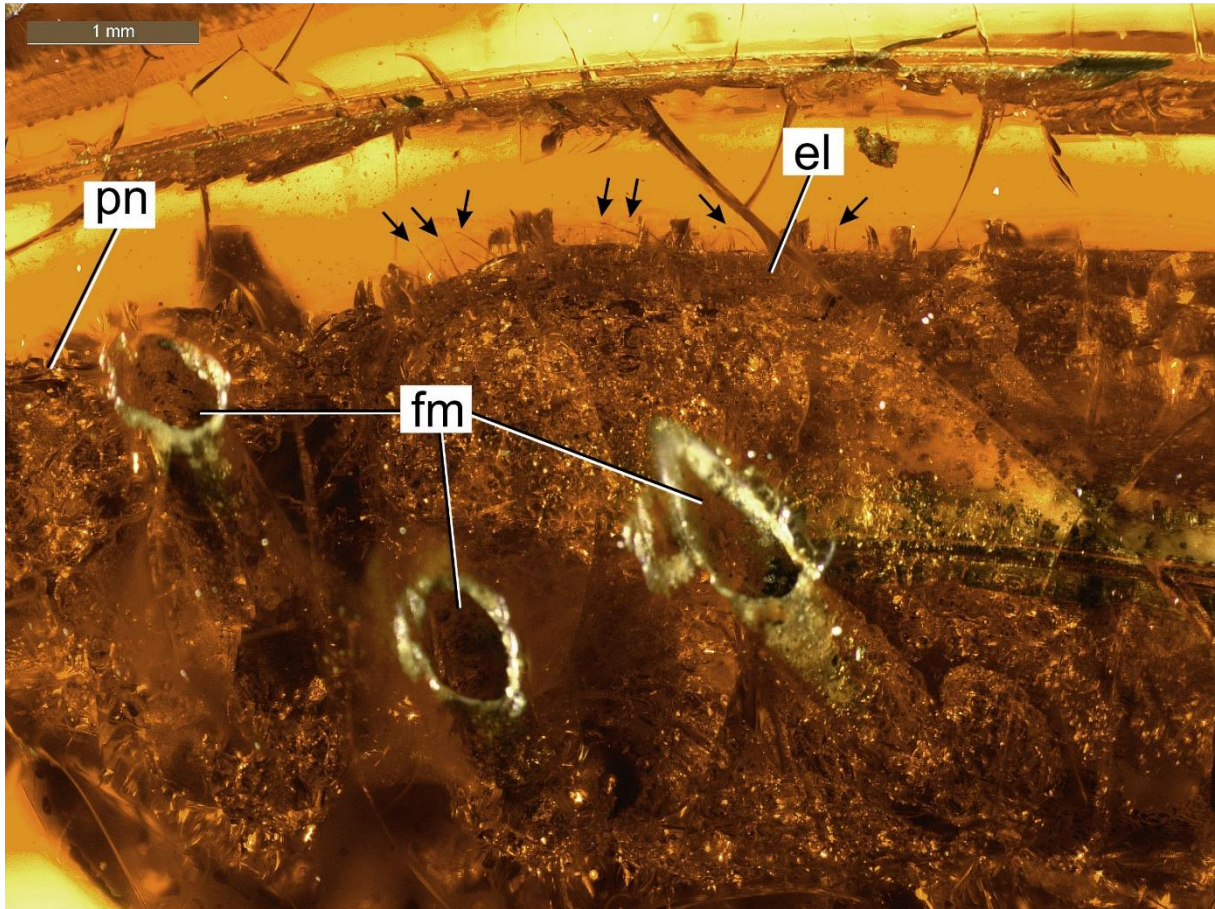

**Figure S2.** Light microscopic documentation of Horn's tiger beetle fossil (*Palaeoiresina cassolai* Wiesner et al., 2017) with specimen ID MB.J 1647 in the NMB: pterothorax, left lateral view. Abbreviations: el: elytron; fm: femora (the black and white bars point to the openings of the left pro-, meso- and metafemora to the amber surface); pn: pronotum. The small black arrows point to the hair-like setae which sparsely cover the anterior third of elytra.

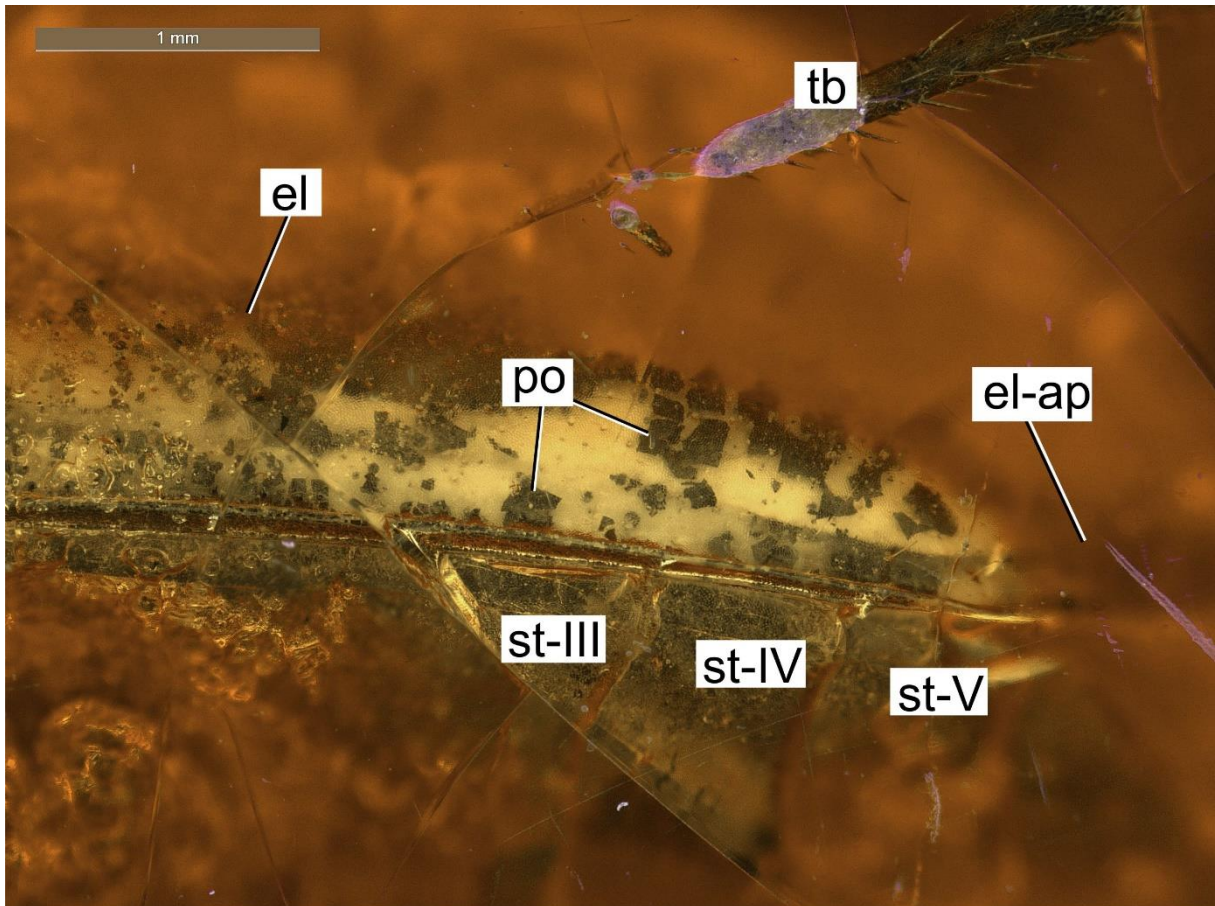

**Figure S3.** Light microscopic documentation of Horn's tiger beetle fossil (*Palaeoiresina cassolai* Wiesner et al., 2017) with specimen ID MB.J 1647 in the NMB: apical portion of left elytron, left lateral view. Abbreviations: el: elytron; el-ap: elytral apex; po: fragments of the positive of the fossilized elytron, showing that the color of elytra was probably dark greenish; st-III, IV, V: abdominal sternites III-V; tb: fragment of the metatibia.



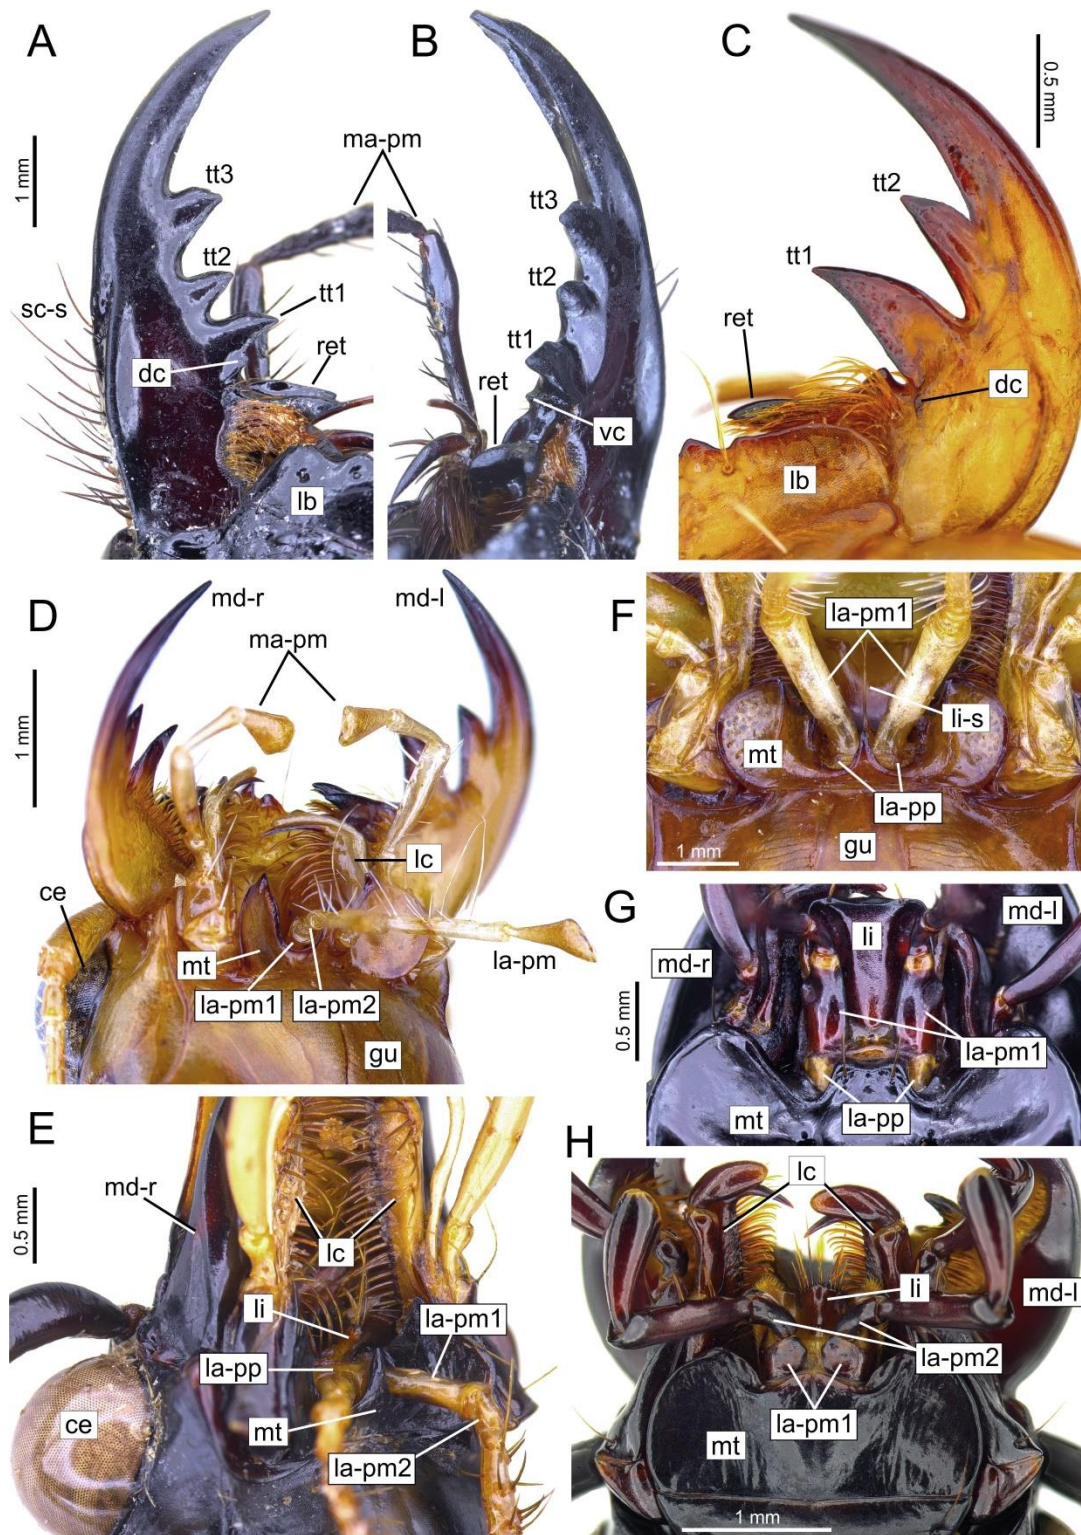

**Figure S4.** Light microscopic photographs of mandibles (A–C) and ventral side of head (D–H) of *Mantica horni* (Cicindelidae: Manticorini) (A,B), *Platychile pallida* (Cicindelidae: Manticorini) (C,D), *Oxycheila chaudiiri* (Cicindelidae: Oxycheiliniini) (E), *Phaeoxantha klugii* (Cicindelidae: Megacephalini) (F), *Lesticus nepalensis* (Carabidae: Harpalinae) (G), *Carabus ernsti* (Carabidae: Carabinae) (H). Abbreviations: **dc**: dorsal cusp of basal terebral tooth; **gu**: gula; **la-pm**: labial palps; **la-pm1**, **pm2**: labial palpomeres 1 resp. 2; **la-pp**: labial palpiger; **lb**: labrum; **lc**: lacinia; **li**: ligula; **li-s**: apical setae of ligula; **ma-pm**: maxillary palps; **md-l**, **-r**: left resp. right mandible; **mt**: mentum; **ret**: retinaculum; **sc-s**: scrobal setae; **tt1**, **tt2**, **tt3**: terebral teeth 1–3; **vc**: ventral cusp of basal terebral tooth.
