# Supplementary material for: MicroCT data provide evidence correcting the previous misidentification of an Eocene amber beetle (Coleoptera, Cicindelidae) as an extant species
Source: PubMed Central journal article supplement (PMC10484930; doi:10.1038/s41598-023-39158-7), 2023-09-07

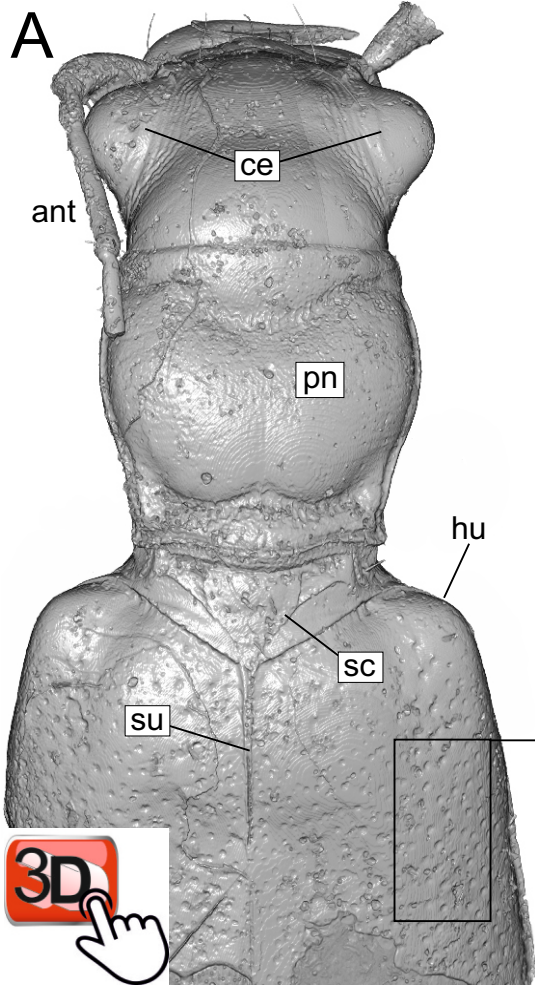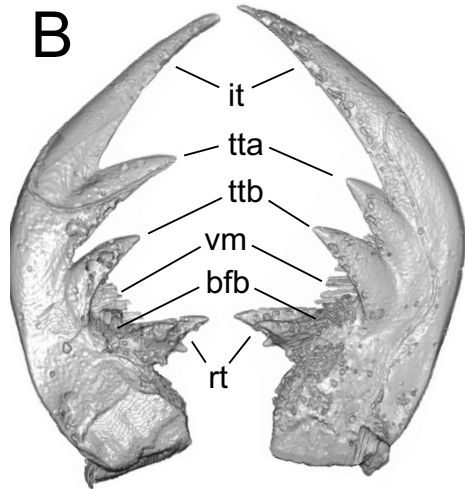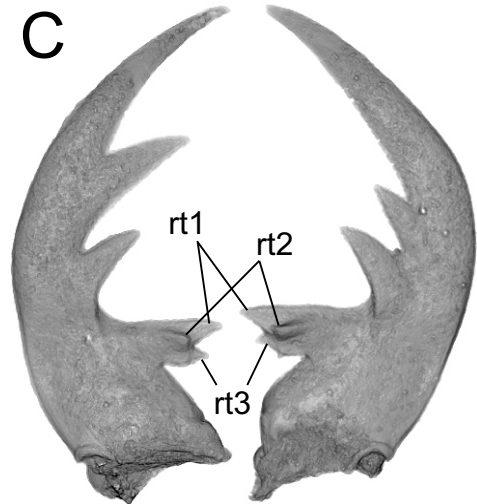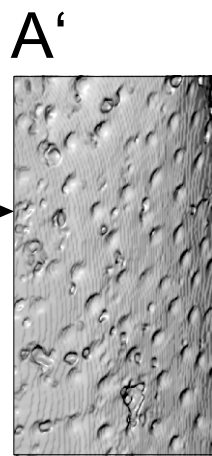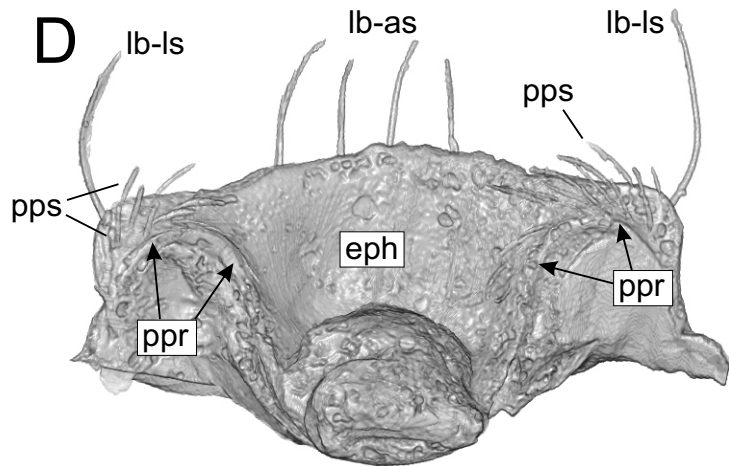

Supplement: 41598_2023_39158_MOESM4_ESM.pdf [file 41598_2023_39158_MOESM4_ESM.pdf]
